# Supplementary material
Source: PubMed Central journal article supplement (PMC7483587)
Supplement: NIHMS1594091-supplement-Supplementary_file.pdf [file NIHMS1594091-supplement-Supplementary_file.pdf]

## Supplementary Data

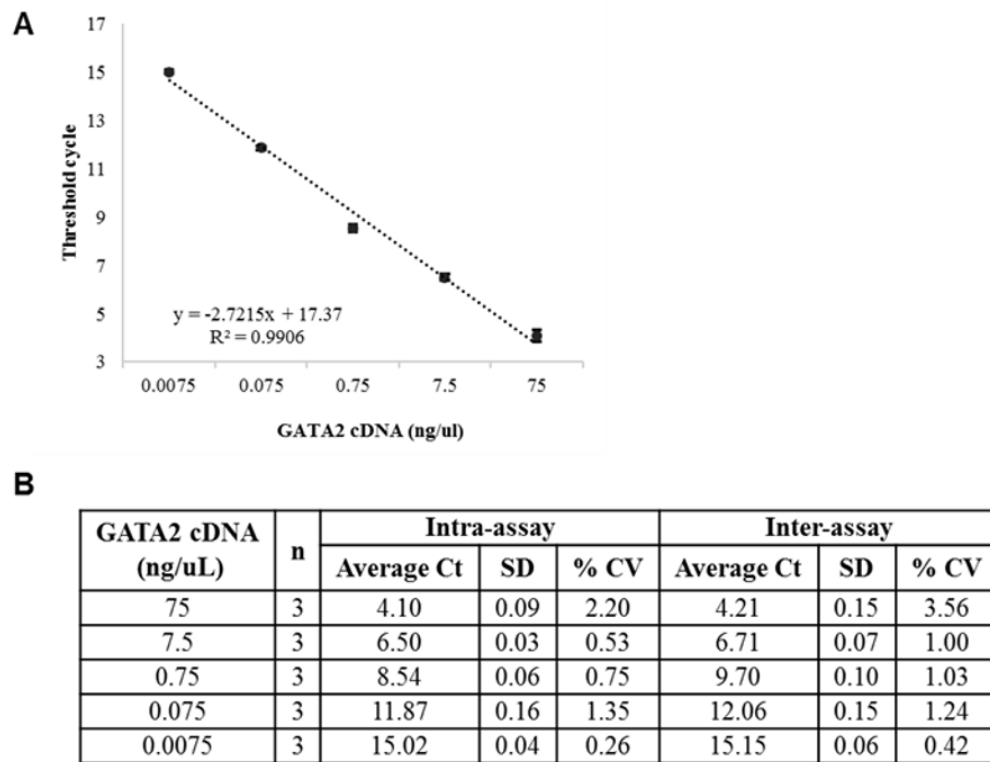

**Fig. S1. A)** Standard curve containing serial dilutions of GATA2 cDNA from 0.0075 to 75ng/ $\mu$ L. Serial dilutions were analyzed in triplicate. The y-axis plots Ct values and the x-axis plots cDNA input. **B)** GATA2 RT-PCR intra- and inter-assay reproducibility.

SD= standard deviation; CV= coefficient variation

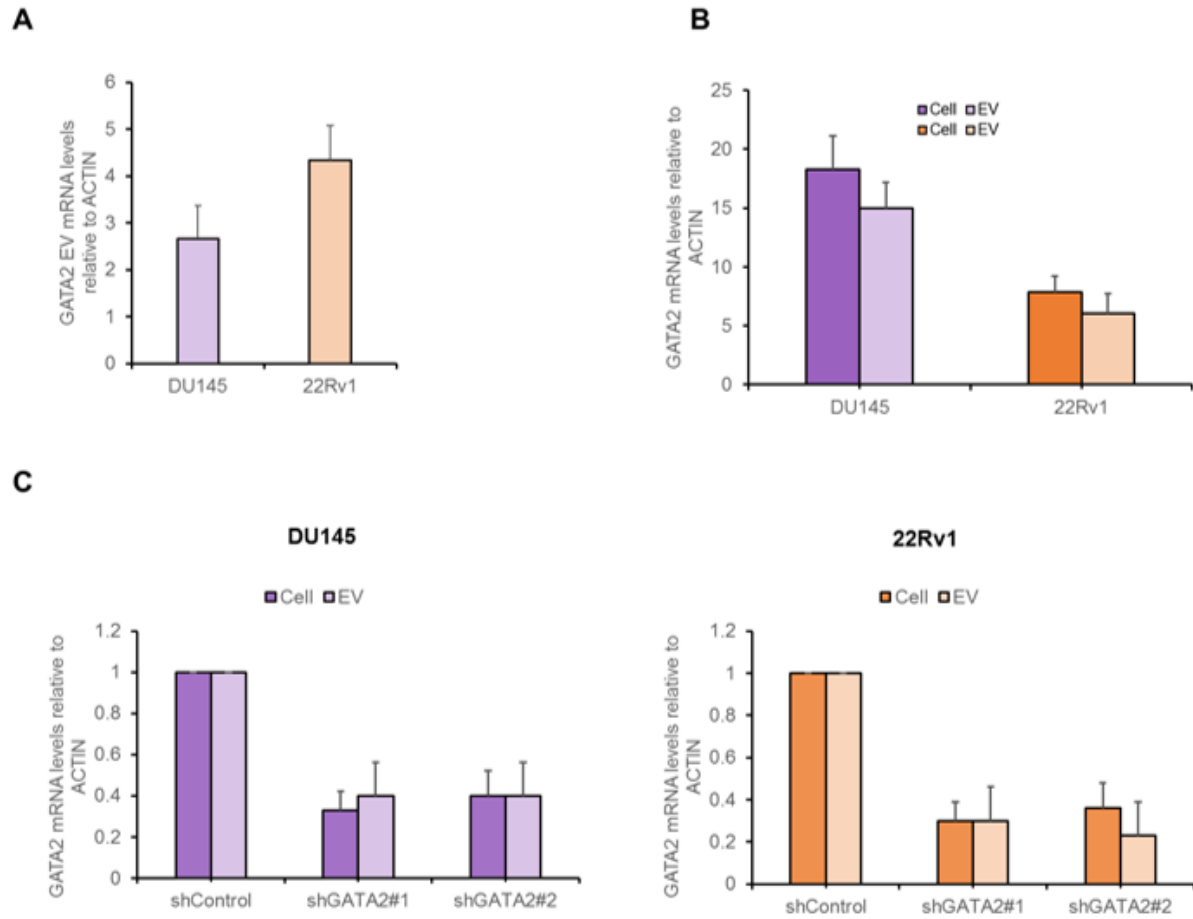

**Fig. S2. A)** EV GATA2 mRNA expression levels from the conditioned media of PCa cells (DU145 and 22Rv1). EV GATA2 mRNA expression levels in paired PCa cells and conditioned media in **B)** GATA2-overexpressing and **C)** GATA2-depleted PCa cells.

EV = extracellular vesicle

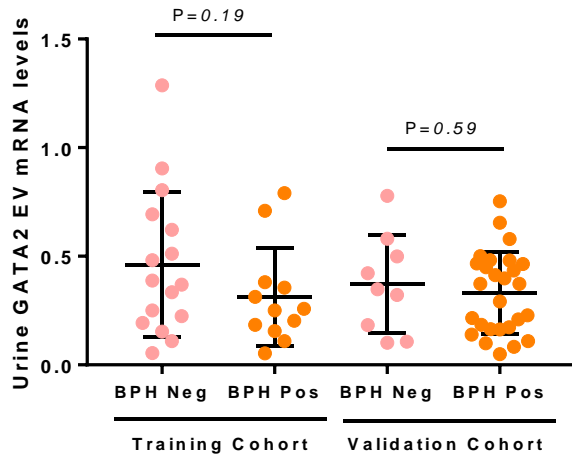

**Fig. S3.** Analysis of EV GATA2 mRNA in patients with negative biopsy result with or without Benign Prostatic Hyperplasia (BPH) (t-test).

EV = extracellular vesicle

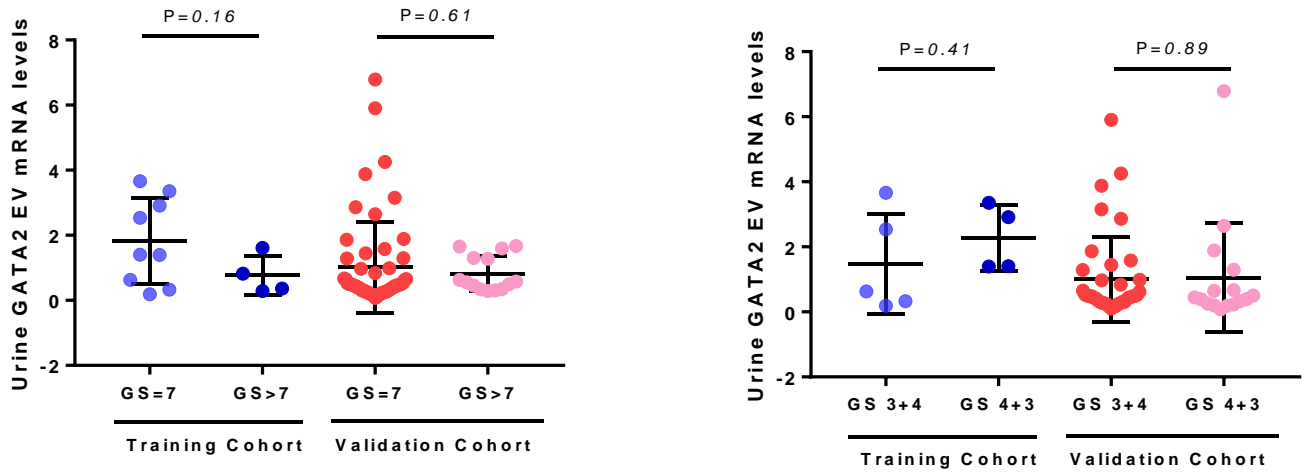

**Fig. S4.** Analysis of urine EV GATA2 mRNA in **A)** Gleason 7 vs >7 and **B)** Gleason 3+4 vs 4+3 PCa (t-test) training and validation cohorts.

EV = extracellular vesicle

**A**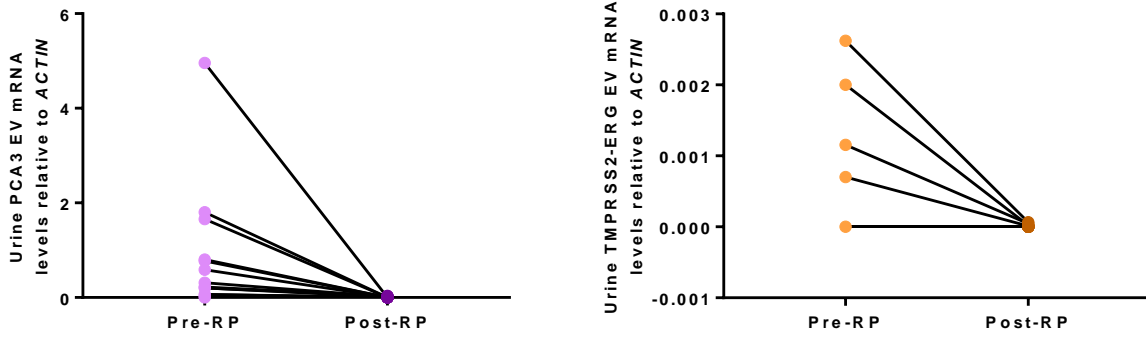**B**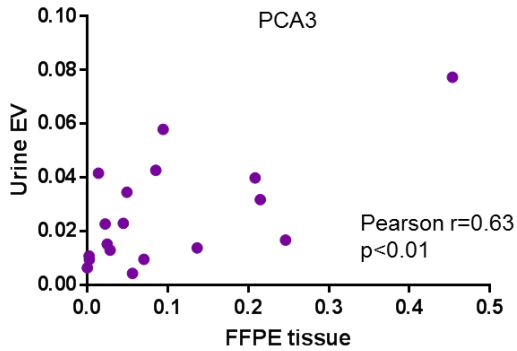

|         |   | TMPRSS2-ERG |          | Fisher test<br>p-value<br><0.05 |
|---------|---|-------------|----------|---------------------------------|
|         |   | Tissue -    | Tissue + |                                 |
| Urine - | 9 | 1           |          |                                 |
| Urine + | 2 | 7           |          |                                 |

**Fig. S5.** Analysis of EV PCA3 and TMPRSS2-ERG mRNA in **A**) paired pre- and post-RP urine samples (n=16, t-test) and in **B**) matching urine and RP FFPE tissue (n=19, Pearson correlation for PCA3 and Fisher test for TMPRSS2-ERG).

EV = extracellular vesicle; RP = radical prostatectomy; FFPE = formalin-fixed paraffin-embedded

**Table S1. Primer sequences used for RT-qPCR.**

| <b>Gene</b>        | <b>Forward Sequence (5' to 3')</b> | <b>Reverse Sequence (5' to 3')</b> |
|--------------------|------------------------------------|------------------------------------|
| <b>GATA2</b>       | CCCTAAGCAGCGCAGCAAGGC              | GATGAGTGGTCGGTTCTGCCC              |
| <b>PCA3</b>        | GCACATTTCCAGCCCCTTA                | GGCATTCTCCCAGGGATCT                |
| <b>TMPRSS2-ERG</b> | TAGGCGCGAGCTAAGCAGGAG              | GTAGGCACACTCAAACAACGACTGG          |
| <b>ACTIN</b>       | CATGTACGTTGCTATCCAGGC              | CTCCTTAATGTCACGCACGAT              |

**Table S2. Scoring Parameters for GAPT-E, PT-E, and SOC scores developed in the training cohort.**

|                            | <b>Training</b> |
|----------------------------|-----------------|
| <b>GAPT-E</b>              |                 |
| Intercept                  | 1.35            |
| log(PCA3)                  | 0.62            |
| log(GATA2)                 | 1.34            |
| T-E (0 vs. >0)             | -1.08           |
| <b>PT-E</b>                |                 |
| Intercept                  | 1.17            |
| log(PCA3)                  | 1.27            |
| T-E (0 vs. >0)             | -0.70           |
| <b>SOC</b>                 |                 |
| Intercept                  | -2.57           |
| PSA (1 pt)                 | 0.07            |
| Family History (No vs Yes) | 0.79            |
| Age (1 year)               | 0.01            |

SOC=standard of care; T-E=TMPRSS2-ERG; PT-E= PCA3 plus TMPRSS2-ERG. GAPT-E= GATA2, PCA3, and TMPRSS2-ERG.

**Table S3. Performance (AUC, 95% CI) of urine EV biomarkers alone, SOC alone and combined.**

|                                  | <b>Training</b>     | <b>Validation</b>   |
|----------------------------------|---------------------|---------------------|
|                                  | <b>AUC (95% CI)</b> | <b>AUC (95% CI)</b> |
| <b>Cancer vs no cancer</b>       |                     |                     |
| GAPT-E                           | 0.84 (0.72-0.96)    | 0.72 (0.63-0.81)    |
| GAPT-E + SOC                     | 0.88 (0.78-0.98)    | 0.72 (0.63-0.80)    |
| PT-E                             | 0.81 (0.66-0.94)    | 0.67 (0.58-0.77)    |
| GATA2                            | 0.74 (0.59-0.89)    | 0.66 (0.57-0.75)    |
| PCA3                             | 0.76 (0.61-0.90)    | 0.62 (0.53-0.72)    |
| SOC                              | 0.64 (0.48-0.81)    | 0.62 (0.52-0.72)    |
| <b>GS 7 vs GS 6 or no cancer</b> |                     |                     |
| GAPT-E                           | 0.85 (0.71-0.99)    | 0.71 (0.63-0.80)    |
| GAPT-E + SOC                     | 0.90 (0.79-1.00)    | 0.75 (0.67-0.83)    |
| PT-E                             | 0.80 (0.65-0.96)    | 0.65 (0.56-0.74)    |
| GATA2                            | 0.78 (0.62-0.94)    | 0.66 (0.57-0.74)    |
| PCA3                             | 0.79 (0.64-0.94)    | 0.62 (0.52-0.71)    |
| SOC                              | 0.73 (0.55-0.90)    | 0.65 (0.55-0.74)    |

AUC=area under the curve; CI=confidence interval; SOC=standard of care; T-E=TMPRSS2-ERG; PT-E= PCA3 plus TMPRSS2-ERG. GAPT-E= GATA2, PCA3, and TMPRSS2-ERG.



**Table S4. Logistic regression model parameters used to generate ROC curves.**

|                            | <b>Any Cancer</b> |                   | <b>High-grade cancer</b> |                   |
|----------------------------|-------------------|-------------------|--------------------------|-------------------|
|                            | <b>Training</b>   | <b>Validation</b> | <b>Training</b>          | <b>Validation</b> |
| <b>GAPT-E + SOC</b>        |                   |                   |                          |                   |
| Intercept                  | -2.00             | 2.00              | -12.4                    | 1.72              |
| GAPT-E Score (1 point)     | 0.0592            | 0.0378            | 0.0612                   | 0.0368            |
| PSA (1 point)              | 0.08              | -0.02             | 0.05                     | -0.02             |
| Age (1 year)               | -0.04             | -0.02             | 0.02                     | -0.02             |
| Family History (No vs Yes) | 1.22              | 0.38              | 6.66                     | 0.49              |
| Race                       | -                 |                   | -                        |                   |
| African American vs. Other | -                 | 0.66              | -                        | 1.08              |
| Caucasian vs. Other        | -                 | -0.54             | -                        | -1.18             |
| <b>GAPT-E alone</b>        |                   |                   |                          |                   |
| Intercept                  | -2.69             | 0.03              | -3.74                    | -0.74             |
| GAPT-E Score (1 point)     | 0.0540            | 0.0372            | 0.0542                   | 0.0349            |
| <b>PT-E alone</b>          |                   |                   |                          |                   |
| Intercept                  | -2.66             | -0.03             | -3.59                    | -0.61             |
| PT-E Score (1 point)       | 0.0528            | 0.0368            | 0.0533                   | 0.0295            |
| <b>SOC</b>                 |                   |                   |                          |                   |
| Intercept                  | -2.57             | 3.23              | -11.2                    | 2.56              |
| PSA (1 point)              | 0.07              | -0.03             | 0.05                     | -0.04             |
| Race                       | -                 | -                 | -                        | -                 |
| African American vs. Other | -                 | 0.64              | -                        | 0.93              |
| Caucasian vs. Other        | -                 | -0.51             |                          | -1.08             |
| Age (1 year)               | 0.01              | -0.02             | 0.05                     | -0.02             |
| Family History (No vs Yes) | 0.79              | 0.31              | 6.34                     | 0.34              |
| <b>PCA3</b>                |                   |                   |                          |                   |

|              |      |      |       |      |
|--------------|------|------|-------|------|
| Intercept    | 0.98 | 2.25 | 0.30  | 1.19 |
| log(PCA3)    | 1.05 | 0.77 | 1.19  | 0.58 |
| <b>GATA2</b> |      |      |       |      |
| Intercept    | 0.49 | 1.79 | -0.33 | 1.10 |
| log(GATA 2)  | 1.13 | 0.73 | 1.20  | 0.81 |

SOC=standard of care; T-E=TMPRSS2-ERG; PT-E= PCA3 plus TMPRSS2-ERG. GAPT-E=  
GATA2, PCA3, and TMPRSS2-ERG.
